# Supplementary material
Source: PubMed Central journal article supplement (PMC3370517)

1 **Supplemental Figure**

2 **Figure S1.** Synteny of the acetone carboxylase operon. Amino acid sequence comparisons  
 3 were performed using the NCBI Blast2 tool on the ExPASy Proteomic Server and the complete  
 4 database Swissprot/TrEMBL without any restriction. Underlined bacteria names represent  
 5 those in which enzyme was already formally identified in the literature. (A) Kingdom of  
 6 Bacteria; (B) Phylum of Proteobacteria; (C) Class of  $\epsilon$ -Proteobacteria.

7  
8  
9  
10  
11  
12  
13  
14  
15  
16  
17  
18  
19  
20  
21  
22  
23  
24  
25  
26  
27  
28  
29  
30  
31  
32  
33  
34  
35  
36  
37  
38  
39  
40

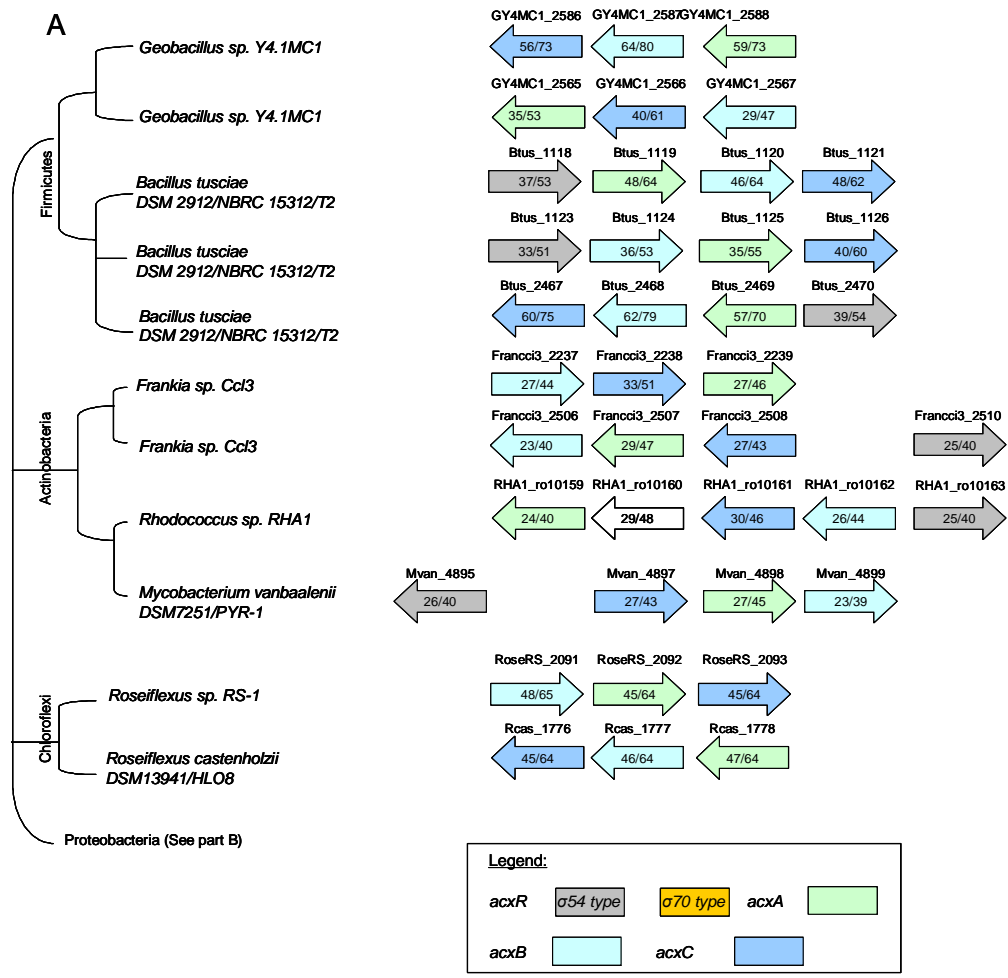

41  
42  
43  
44  
45  
46  
47  
48  
49  
50  
51  
52  
53  
54  
55  
56  
57  
58  
59  
60  
61  
62  
63  
64  
65  
66  
67  
68  
69  
70  
71  
72  
73  
74  
75  
76  
77  
78  
79  
80  
81  
82  
83  
84  
85  
86  
87

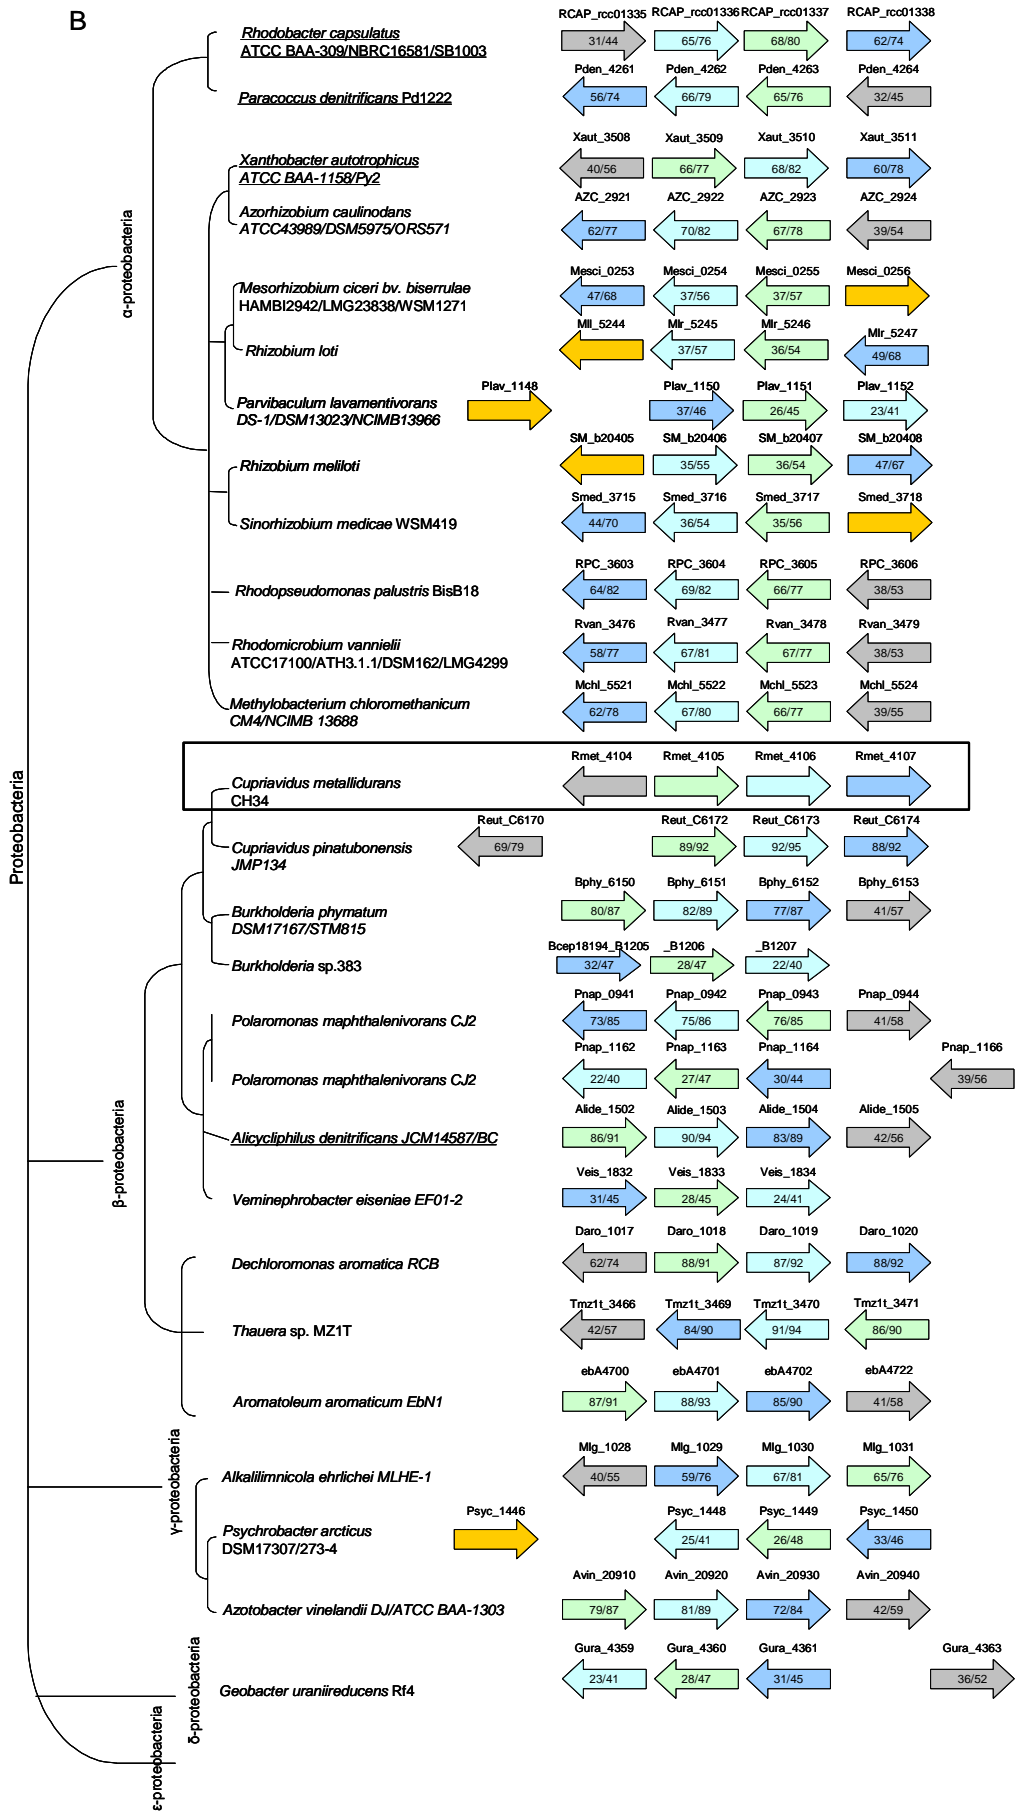

88  
89  
90  
91  
92  
93  
94  
95  
96  
97  
98  
99  
100  
101  
102  
103  
104  
105  
106  
107  
108  
109  
110  
111  
112  
113  
114  
115  
116  
117  
118  
119  
120  
121  
122  
123  
124  
125  
126  
127  
128  
129  
130  
131  
132  
133  
134

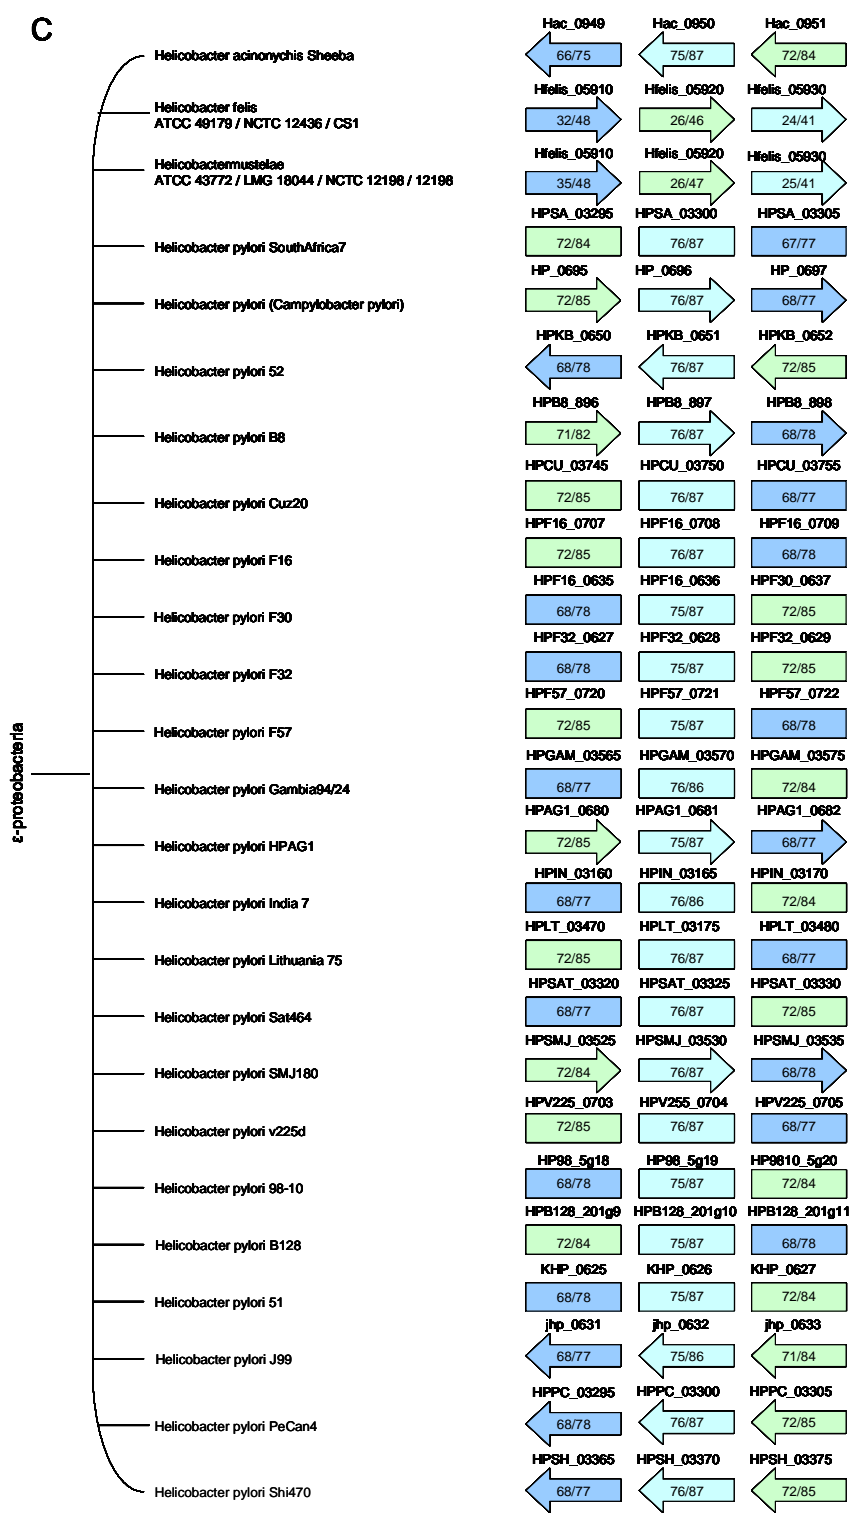

Supplement: supp_78.12.4516_AEM07974-11_FigS1.pdf [file supp_78.12.4516_AEM07974-11_FigS1.pdf]
